# Supplementary material for: Incidence of All-Cause, Cardiovascular, and Atrial Fibrillation-Related Hospitalizations: Focus on Antiarrhythmic Drugs
Source: PubMed Central journal article supplement — JACC Adv. 2024 Jul 12;3(8):101117. doi: 10.1016/j.jacadv.2024.101117 (PMC11299568; doi:10.1016/j.jacadv.2024.101117), 2024-07-12
Supplement: mmc1.pdf [file mmc1.pdf]

**Supplementary Table 1. Population characteristics according to hospitalization status.**

|                                                      | <b>Total Cohort<br/>(n: 2,782)</b> | <b>No<br/>Hospitalization<br/>(n: 1,577)</b> | <b>All-cause<br/>Hospitalization<br/>(n: 1,205)</b> | <b>p-value</b> |
|------------------------------------------------------|------------------------------------|----------------------------------------------|-----------------------------------------------------|----------------|
| <b>Female sex (%)</b>                                | 43.5                               | 43.9                                         | 43.1                                                | 0.671          |
| <b>Age (mean)</b>                                    | 74.6±9.1                           | 74.7±9.4                                     | 74.5±8.6                                            | 0.565          |
| <b>Permanent/persistent<br/>AF (%)</b>               | 62.8                               | 62.8                                         | 62.7                                                | 1.000          |
| <b>Arterial hypertension<br/>(%)</b>                 | 86.7                               | 85.5                                         | 88.4                                                | 0.024          |
| <b>Diabetes (%)</b>                                  | 21.3                               | 19.6                                         | 23.6                                                | 0.012          |
| <b>Previous stroke/TIA<br/>(%)</b>                   | 15.1                               | 14.7                                         | 15.7                                                | 0.455          |
| <b>Previous myocardial<br/>infarction (%)</b>        | 17.1                               | 15.5                                         | 19.1                                                | 0.013          |
| <b>COPD (%)</b>                                      | 15.1                               | 12.5                                         | 18.3                                                | <0.001         |
| <b>Cancer (%)</b>                                    | 16.4                               | 12.8                                         | 21.0                                                | <0.001         |
| <b>Heart failure (%)</b>                             | 14.1                               | 12.6                                         | 16.0                                                | 0.011          |
| <b>CKD (%)</b>                                       | 32.9                               | 31.5                                         | 34.5                                                | 0.142          |
| <b>CHA<sub>2</sub>DS<sub>2</sub>-VASc<br/>(mean)</b> | 3.6±1.5                            | 3.5±1.5                                      | 3.7±1.5                                             | 0.001          |
| <b>HAS-BLED (mean)</b>                               | 2.3±0.9                            | 2.2±0.8                                      | 2.4±0.9                                             | <0.001         |
| <b>Therapy</b>                                       |                                    |                                              |                                                     |                |
| <b>DOAC (%)</b>                                      | 33.1                               | 39.1                                         | 25.1                                                | <0.001         |
| <b>Lipid lowering<br/>therapy (%)</b>                | 39.3                               | 38.2                                         | 40.7                                                | 0.183          |
| <b>ACE-I/ARBs (%)</b>                                | 62.7                               | 59.8                                         | 66.4                                                | <0.001         |
| <b>Beta-blockers (%)</b>                             | 44.8                               | 45.3                                         | 44.2                                                | 0.590          |
| <b>Calcium channel<br/>blockers (%)</b>              | 27.7                               | 26.1                                         | 30.0                                                | 0.024          |
| <b>Verapamil/diltiazem<br/>(%)</b>                   | 9.8                                | 9.5                                          | 10.3                                                | 0.468          |
| <b>Nitrates (%)</b>                                  | 9.8                                | 7.9                                          | 12.2                                                | <0.001         |
| <b>Antiarrhythmics (%)</b>                           | 27.6                               | 25.8                                         | 29.7                                                | 0.027          |
| <i>Ic Class</i>                                      | 13.4                               | 13.1                                         | 13.9                                                | 0.501          |
| <i>Amiodarone</i>                                    | 14.4                               | 13.4                                         | 15.8                                                | 0.076          |
| <b>Digoxin (%)</b>                                   | 13.6                               | 12.5                                         | 15.1                                                | 0.047          |
| <b>Hypoglycemic drugs<br/>(%)</b>                    | 16.6                               | 15.2                                         | 18.3                                                | 0.050          |
| <b>Diuretics (%)</b>                                 | 43.6                               | 42.7                                         | 44.6                                                | 0.316          |
| <b>Proton pump inhibitor<br/>(%)</b>                 | 44.8                               | 45.8                                         | 43.5                                                | 0.233          |

*ACE-I/ARBs: angiotensin converting enzyme inhibitors/Angiotensin receptor blockers, COPD: chronic obstructive pulmonary disease, DOAC: direct oral anticoagulant.*

**Supplementary Table 2. Multivariable Cox proportional hazards regression analysis of cardiac hospitalization.**

|                                | Hazard Ratio | 95% Confidence interval |       | p-value |
|--------------------------------|--------------|-------------------------|-------|---------|
|                                |              | Low                     | High  |         |
| Age                            | 1.006        | 0.996                   | 1.017 | 0.255   |
| Female sex                     | 0.936        | 0.781                   | 1.123 | 0.478   |
| Arterial hypertension          | 1.206        | 0.875                   | 1.661 | 0.253   |
| Diabetes                       | 1.036        | 0.837                   | 1.281 | 0.746   |
| Previous myocardial infarction | 1.189        | 0.926                   | 1.527 | 0.174   |
| COPD                           | 1.396        | 1.110                   | 1.757 | 0.004   |
| Cancer                         | 1.194        | 0.953                   | 1.497 | 0.124   |
| Heart failure                  | 1.364        | 1.076                   | 1.729 | 0.010   |
| ACE-I/ARB                      | 1.002        | 0.817                   | 1.229 | 0.984   |
| Nitrates                       | 0.997        | 0.757                   | 1.314 | 0.983   |
| Ic Class antiarrhythmics       | 1.386        | 1.074                   | 1.789 | 0.012   |
| Amiodarone                     | 1.495        | 1.197                   | 1.868 | <0.001  |
| Beta-blockers                  | 1.033        | 0.853                   | 1.250 | 0.742   |
| Verapamil/diltiazem            | 0.990        | 0.724                   | 1.353 | 0.949   |
| Digoxin                        | 1.243        | 0.977                   | 1.581 | 0.076   |
| DOAC vs VKA                    | 0.586        | 0.468                   | 0.733 | <0.001  |
| Lipid lowering therapy         | 1.087        | 0.897                   | 1.317 | 0.396   |

*ACE-I/ARBs: angiotensin converting enzyme inhibitors/Angiotensin receptor blockers, COPD: chronic obstructive pulmonary disease, DOAC: direct oral anticoagulant, VKA: vitamin K antagonist.*
